# Supplementary material for: Effects of Cadmium Sulfate on the Brown Garden Snail Cornu aspersum: Implications for DNA Methylation
Source: MDPI journal article supplement (doi:10.3390/toxics9110306), 2021-11-15
Supplement: s1 [file s1]

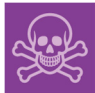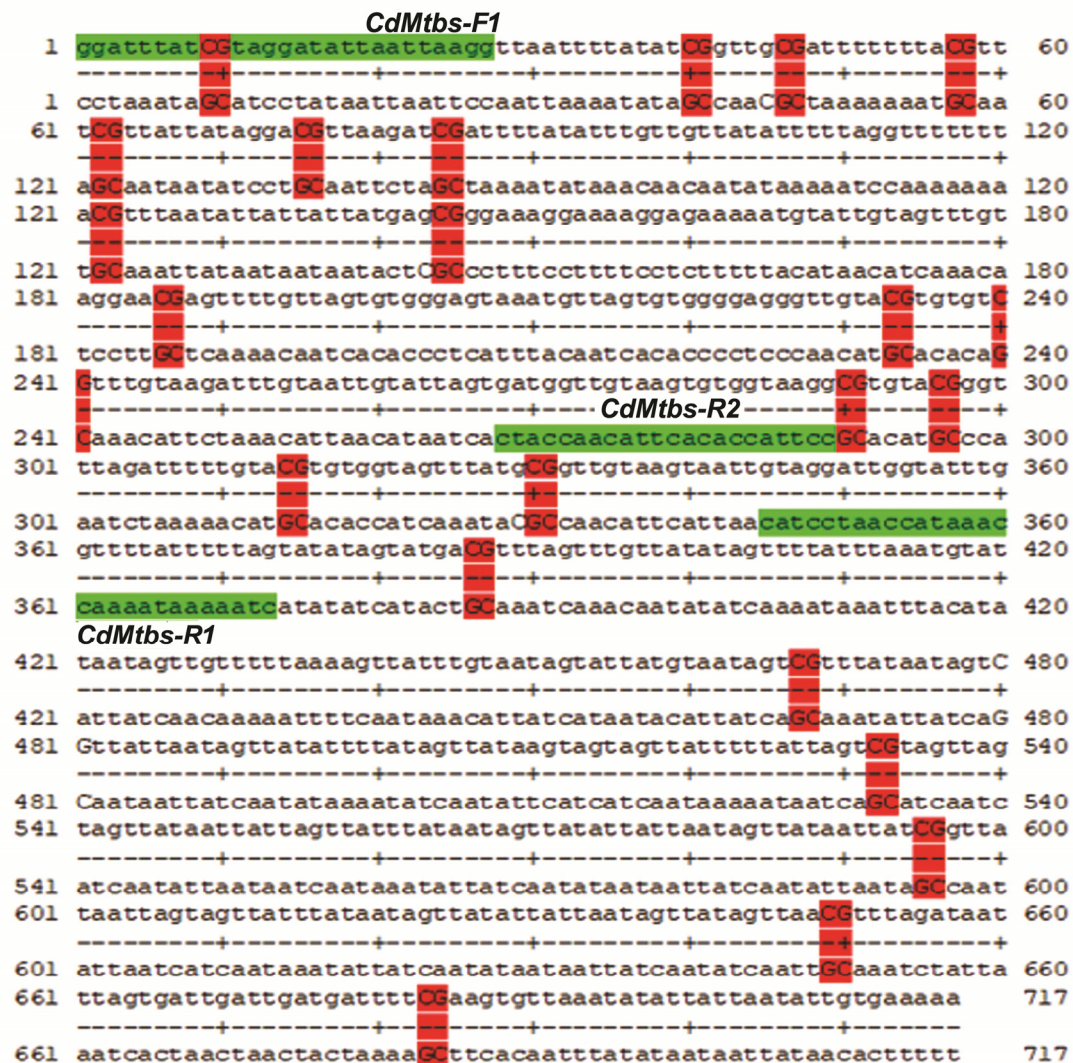

**Figure S1.** CpG and GpC sites (double-stranded) in the 5'-UTR of the *Cd-MT* mRNA in *C. aspersum*. Nucleotide sequence was obtained with Gene Runner based on the amino acid sequence alignment of *Cd-MT* protein. The CpG and GpC sites are highlighted in red. The primers sequences are highlighted in green.
